# Supplementary material for: Medio siglo de gestión de la calidad: recuerdos de un discípulo de Enrique Blanco
Source: Royal Society of Chemistry journal article supplement (doi:10.1039/d3cc02594b), 2002-01-01
Supplement: d3cc02594b1.pdf [file d3cc02594b1.pdf]

*Supplementary Information for*

**Revealing the Origin of Activity in Phthalocyanine-Based Dual-Metal Sites Towards Electrochemical Nitric Oxide Reduction**

Xiaorong Zhu, <sup>†\*</sup> Xiaolei Yuan, <sup>†</sup> Yijin Wang, <sup>†</sup> Ming Ge, <sup>†\*</sup> Yanfeng Tang<sup>†\*</sup>

<sup>†</sup> School of Chemistry and Chemical Engineering, Nantong University, Nantong 226019, China.

\*To whom correspondence should be addressed. Email: xiaorongzhu@ntu.edu.cn (XZ) and tangyf@ntu.edu.cn (YT)

Spin-polarized DFT calculations are performed using the Vienna ab initio simulation package (VASP)<sup>1-2</sup>. The exchange-correlation energy is described using the Perdew-Burke-Ernzerhof (PBE) functional within the generalized gradient approximation (GGA)<sup>3-4</sup>. A kinetic energy cutoff of 500 eV is adopted, whereas the core electrons are modeled by projector augmented wave (PAW) pseudo potentials<sup>5</sup>. The convergence criteria are set at  $10^{-5}$  eV for total energy and  $0.02 \text{ eV \AA}^{-1}$  for force. In this work, ten transition metal bi-atom pairs are decorated in phthalocyanine cages. The Brillouin zone is sampled using a  $3 \times 3 \times 1$  Monkhorst-Pack k-point grid for structural optimizations, while a denser mesh of  $9 \times 9 \times 1$  is used for electronic structure computations. A vacuum space of  $\approx 15 \text{ \AA}$  is added to eliminate interactions between two adjacent periodic images. vdW interactions between catalysts and reaction intermediates are described using DFT + D3<sup>6</sup>.

The computational hydrogenation electrode (CHE) model developed by Nørskov et al.<sup>7</sup> is used to study the free energy profile of NORR. The Gibbs free energy change for each elementary step is calculated using the following equation:

$$\Delta G = \Delta E + \Delta E_{ZPE} - T\Delta S + \Delta G_U + \Delta G_{pH}$$

where the  $\Delta E$  is obtained from the DFT calculations,  $\Delta E_{ZPE}$  is the zero-point energy change between the reactants and products. T is the temperature (298.15 K), and the  $\Delta S$  represents the change in entropy of products and reactants.  $\Delta G_{pH} = -k_B T \ln 10 \times pH$ ,  $k_B$  is the Boltzmann constant and the pH was set as zero.  $\Delta G_U$  is the free energy change of the electrode potential. Bader charge analysis evaluates charge transfer between bi-atom pairs and substrate N coordinates. The stability of  $\text{TM}_2\text{-Pc}$  is evaluated by the formation energy and the dissolution energy<sup>8</sup>, represented as:

$$E_{formation} = \frac{1}{2} \times (E_{\text{TM}_2\text{-Pc}} - E_{\text{Pc}} - 2E_{\text{TM}})$$

$$U_{diss} = U_{diss}^0(\text{TM}, \text{bulk}) - E_{formation} / eNe$$

Where the  $E_{TM_2-Pc}$ ,  $E_{Pc}$ ,  $E_{TM}$  represent the total energies of BACs (TM<sub>2</sub>-Pc, O-TM<sub>2</sub>-Pc), DACs without TM atoms, and metal atoms in the most stable bulk structure, respectively.  $U_{diss}^0(TM, bulk)$  and the  $Ne$  represent the standard dissolution potential of the bulk metal and the number of electrons involved in the dissolution, respectively.

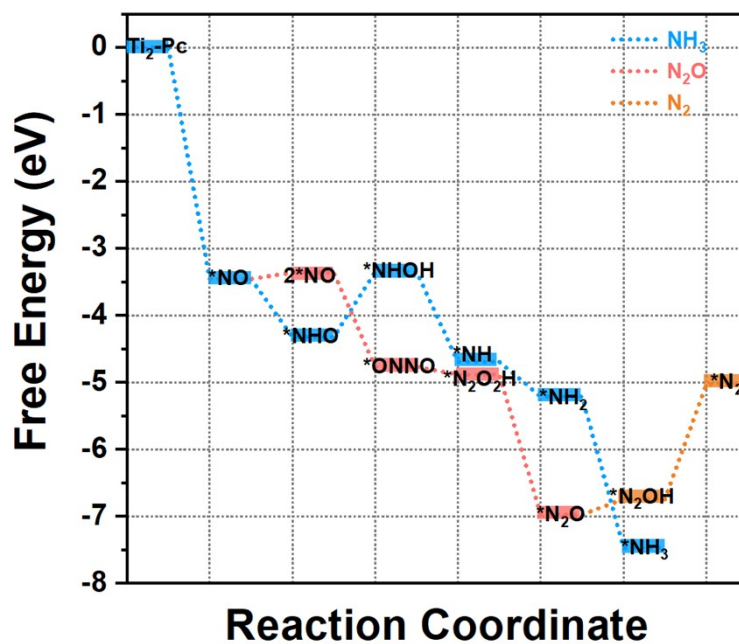

Fig. S1. The free energy diagram of NO reduction (toward  $\text{NH}_3$ ,  $\text{N}_2\text{O}$ ,  $\text{N}_2$  formation) on  $\text{Ti}_2\text{-Pc}$

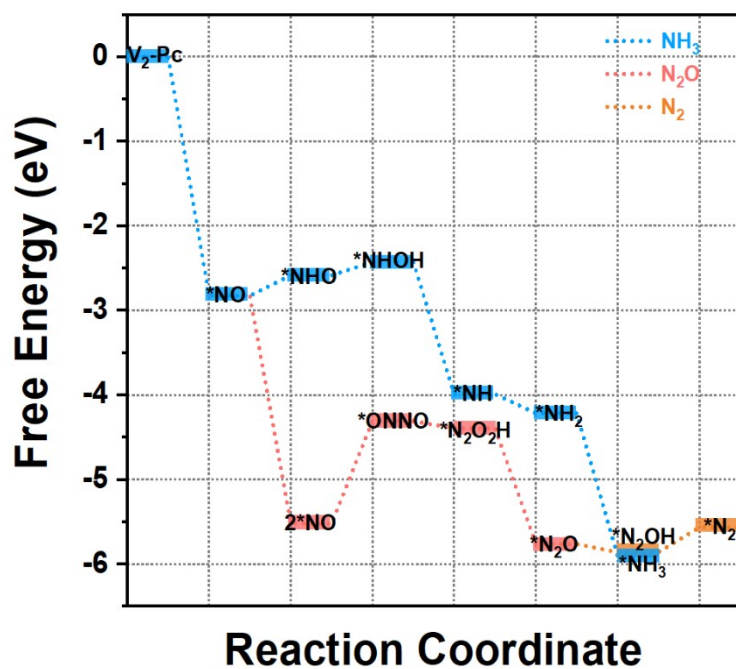

Fig. S2. The free energy diagram of NO reduction (toward  $\text{NH}_3$ ,  $\text{N}_2\text{O}$ ,  $\text{N}_2$  formation) on  $\text{V}_2\text{-Pc}$

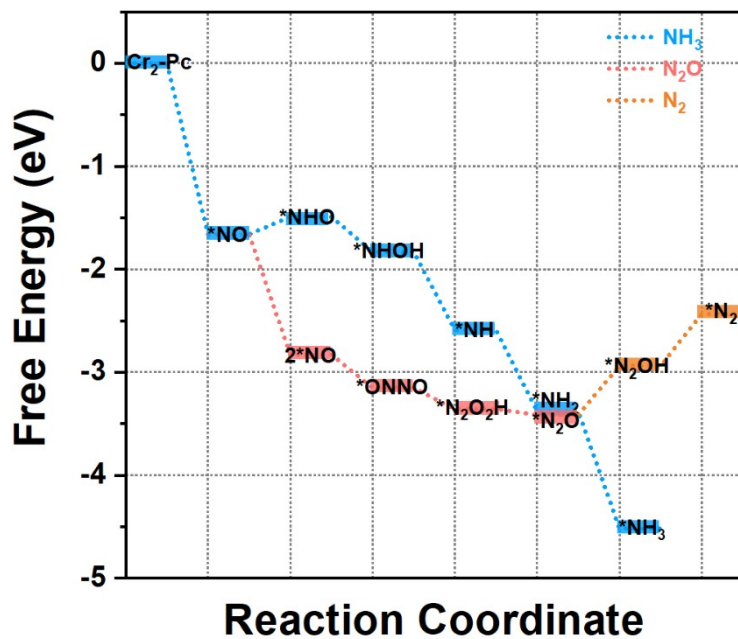

Fig. S3. The free energy diagram of NO reduction (toward  $\text{NH}_3$ ,  $\text{N}_2\text{O}$ ,  $\text{N}_2$  formation) on  $\text{Cr}_2\text{-Pc}$

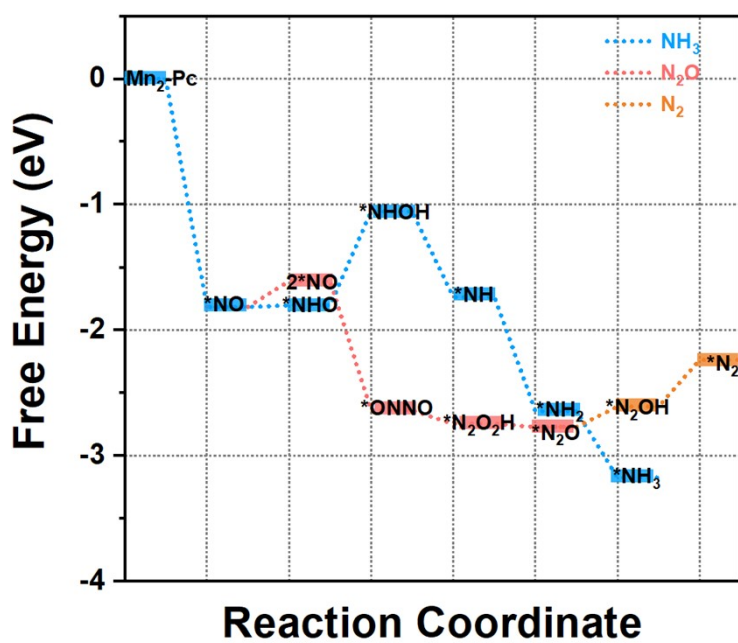

Fig. S4. The free energy diagram of NO reduction (toward  $\text{NH}_3$ ,  $\text{N}_2\text{O}$ ,  $\text{N}_2$  formation) on  $\text{Mn}_2\text{-Pc}$

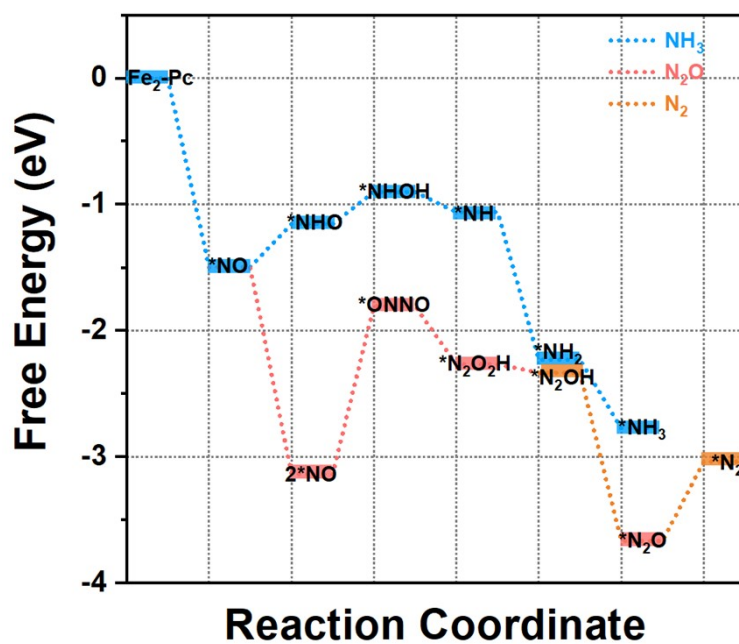

Fig. S5. The free energy diagram of NO reduction (toward  $\text{NH}_3$ ,  $\text{N}_2\text{O}$ ,  $\text{N}_2$  formation) on  $\text{Fe}_2\text{-Pc}$

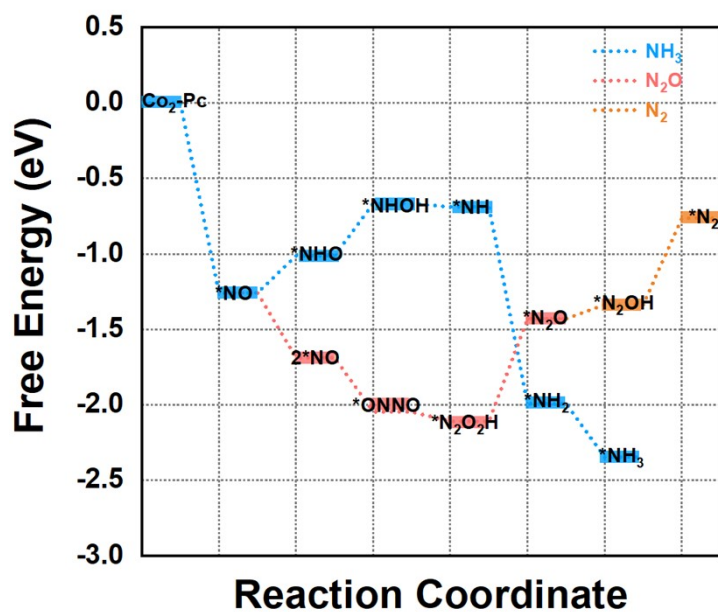

Fig. S6. The free energy diagram of NO reduction (toward  $\text{NH}_3$ ,  $\text{N}_2\text{O}$ ,  $\text{N}_2$  formation) on  $\text{Co}_2\text{-Pc}$

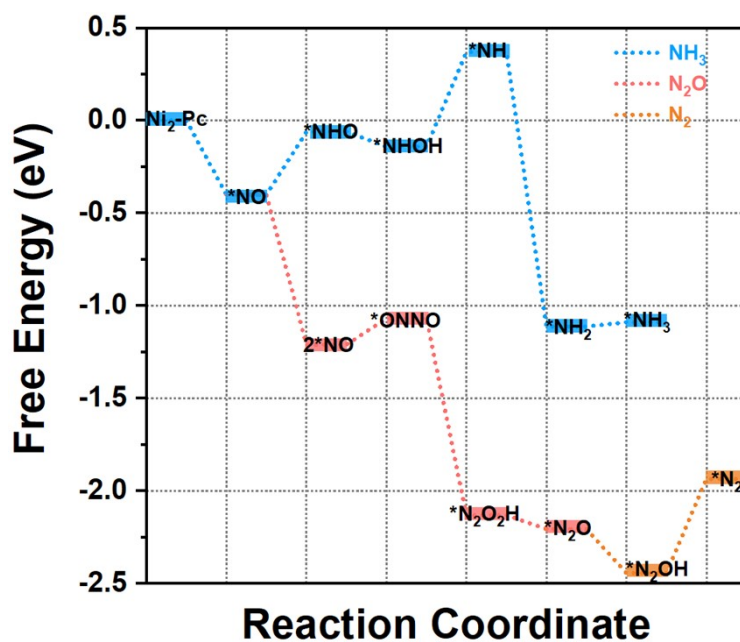

**Fig. 7.** The free energy diagram of NO reduction (toward  $\text{NH}_3$ ,  $\text{N}_2\text{O}$ ,  $\text{N}_2$  formation) on  $\text{Ni}_2\text{-Pc}$

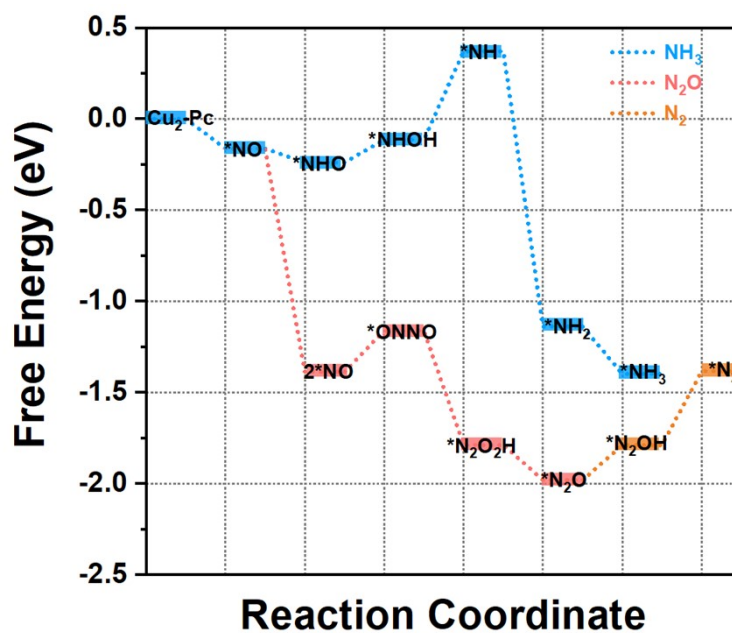

**Fig. S8.** The free energy diagram of NO reduction (toward  $\text{NH}_3$ ,  $\text{N}_2\text{O}$ ,  $\text{N}_2$  formation) on  $\text{Cu}_2\text{-Pc}$

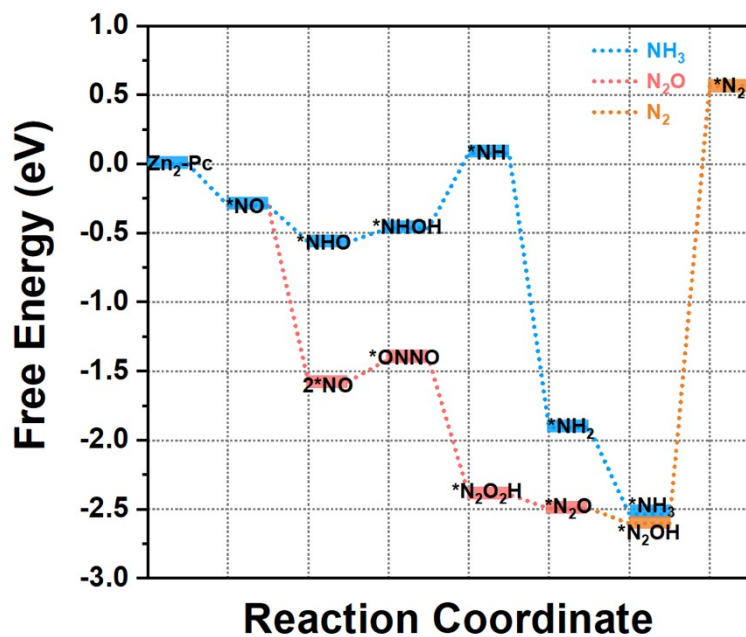

**Fig. S9.** The free energy diagram of NO reduction (toward  $\text{NH}_3$ ,  $\text{N}_2\text{O}$ ,  $\text{N}_2$  formation) on  $\text{Zn}_2\text{-Pc}$

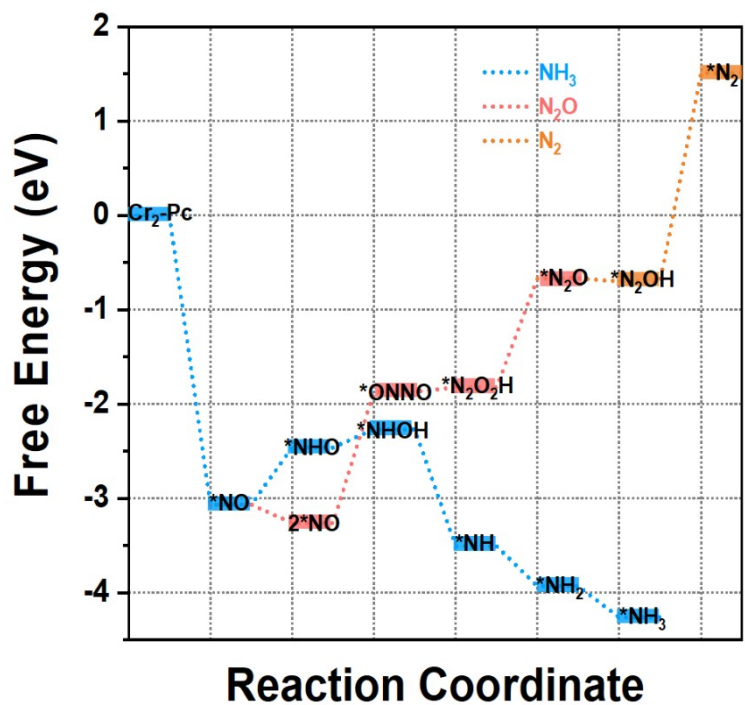

**Fig. S10.** The free energy diagram of NO reduction (toward  $\text{NH}_3$ ,  $\text{N}_2\text{O}$ ,  $\text{N}_2$  formation) on O-ligand modified  $\text{Cr}_2\text{-Pc}$



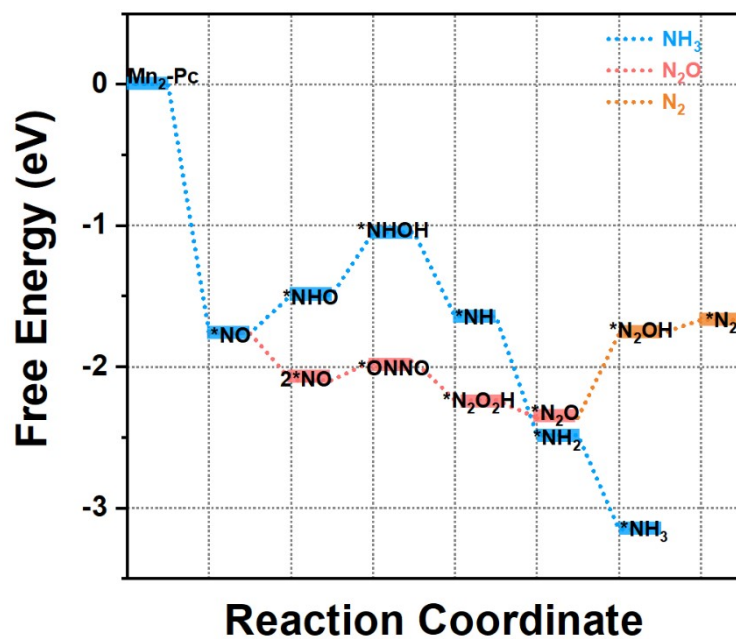

**Fig. S11.** The free energy diagram of NO reduction (toward  $\text{NH}_3$ ,  $\text{N}_2\text{O}$ ,  $\text{N}_2$  formation) on O-ligand modified  $\text{Mn}_2\text{-Pc}$

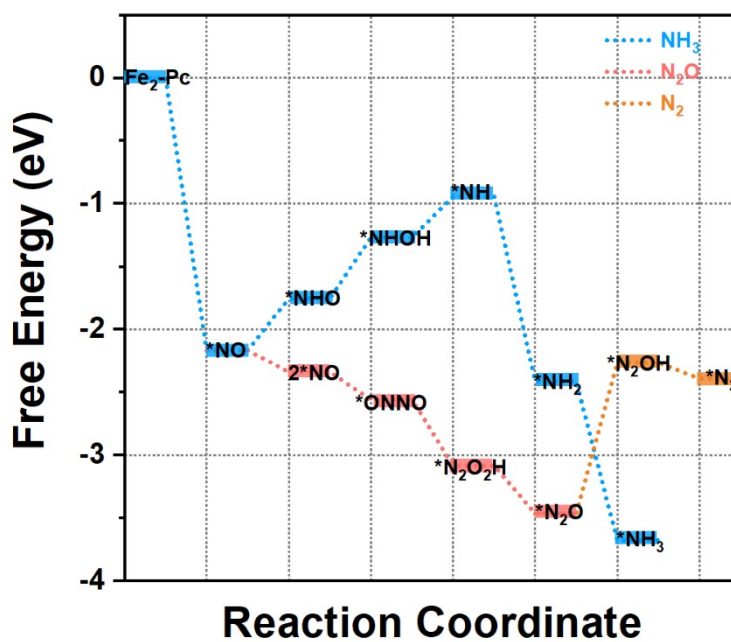

**Fig. S12.** The free energy diagram of NO reduction (toward  $\text{NH}_3$ ,  $\text{N}_2\text{O}$ ,  $\text{N}_2$  formation) on O-ligand modified  $\text{Fe}_2\text{-Pc}$

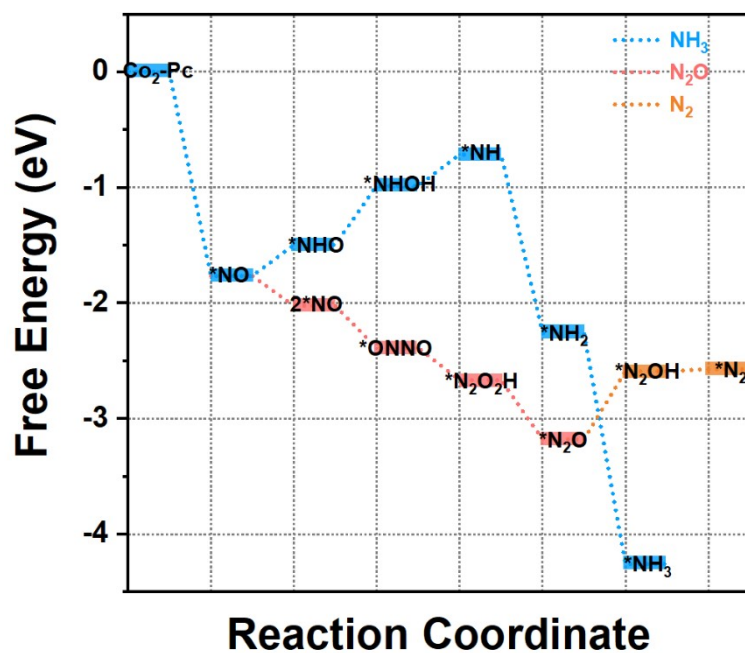

**Fig. S13.** The free energy diagram of NO reduction (toward  $\text{NH}_3$ ,  $\text{N}_2\text{O}$ ,  $\text{N}_2$  formation) on O-ligand modified  $\text{Co}_2\text{-Pc}$

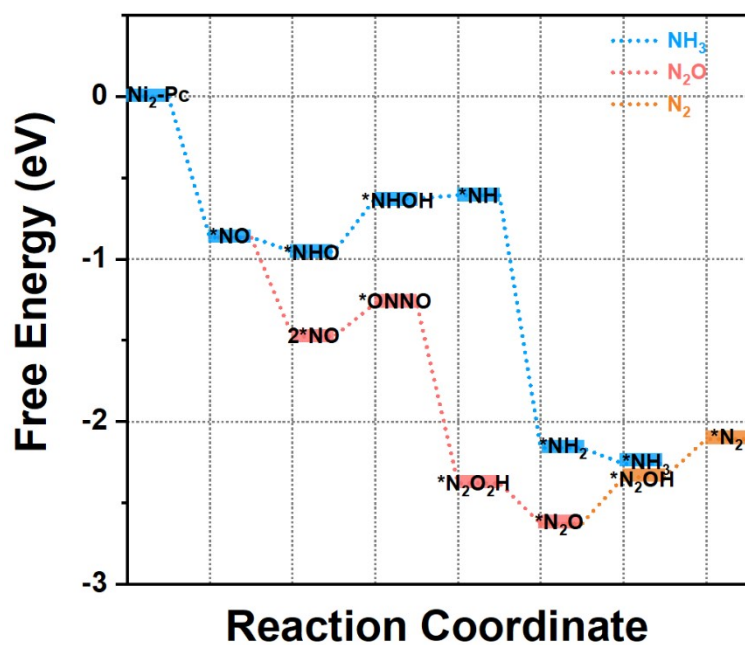

**Fig. S14.** The free energy diagram of NO reduction (toward  $\text{NH}_3$ ,  $\text{N}_2\text{O}$ ,  $\text{N}_2$  formation) on O-ligand modified  $\text{Ni}_2\text{-Pc}$

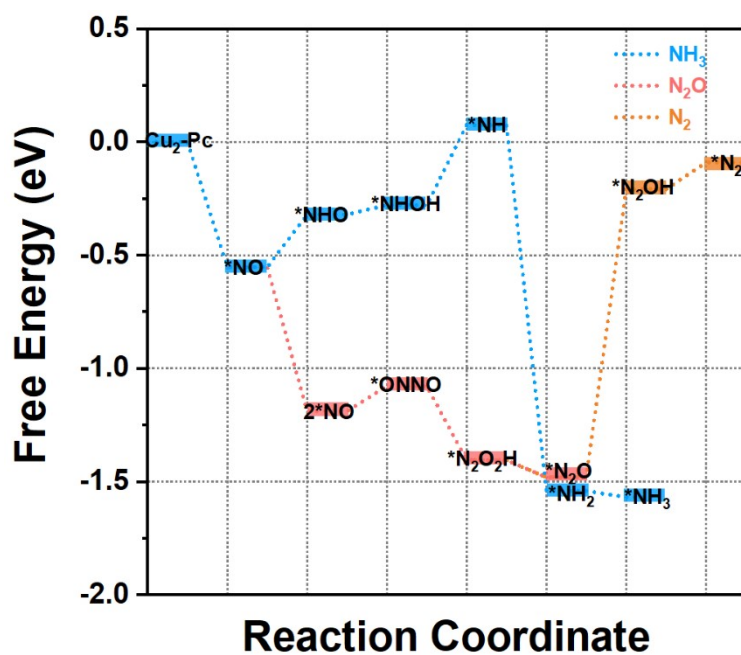

**Fig. S15.** The free energy diagram of NO reduction (toward  $\text{NH}_3$ ,  $\text{N}_2\text{O}$ ,  $\text{N}_2$  formation) on O-ligand modified  $\text{Cu}_2\text{-Pc}$

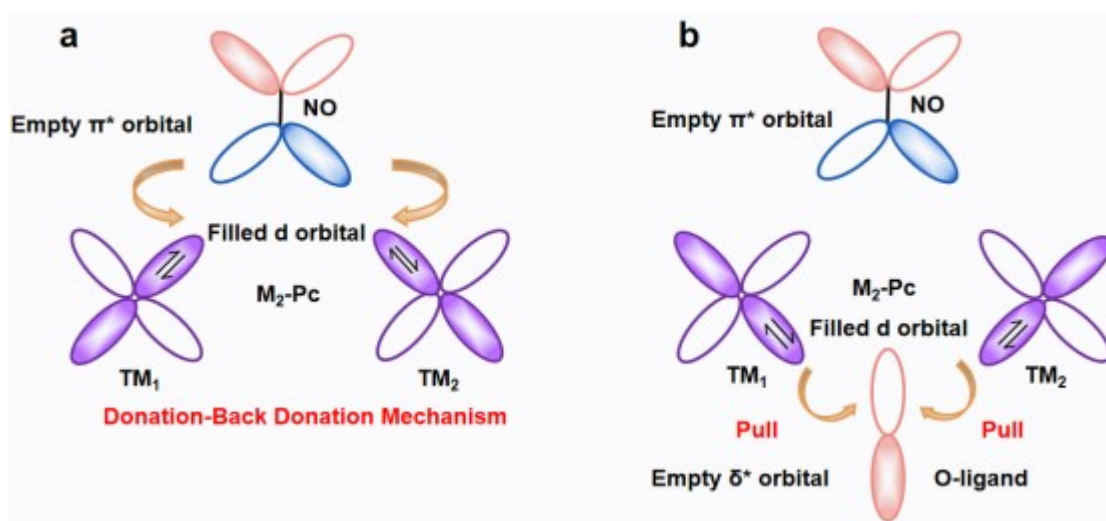

**Figure S16** The schematic diagram illustrates the donation-back donation mechanism of NO on  $\text{TM}_2\text{-Pc}$  surfaces and the pulling effect diagram after the introduction of O axial ligand.

**Table S1** The formation energy and the dissolution energy of pristine  $TM_2$ -Pc.

|                          | Surface | Substrate | Metal  | $E_f$ | $U_{\text{diss}}$ | $U^0_{\text{diss}}$ | Ne   |
|--------------------------|---------|-----------|--------|-------|-------------------|---------------------|------|
| <b>Co<sub>2</sub>-Pc</b> | -413.71 | -390.59   | -27.88 | -4.59 | 1.01              | -0.28               | 2.00 |
| <b>Cr<sub>2</sub>-Pc</b> | -419.54 | -390.55   | -36.38 | -5.40 | 0.90              | -0.91               | 2.00 |
| <b>Cu<sub>2</sub>-Pc</b> | -404.41 | -389.95   | -14.88 | -3.51 | 1.05              | 0.34                | 2.00 |
| <b>Fe<sub>2</sub>-Pc</b> | -416.57 | -392.73   | -32.31 | -3.84 | 0.74              | -0.45               | 2.00 |
| <b>Mn<sub>2</sub>-Pc</b> | -418.88 | -390.61   | -35.60 | -5.24 | 0.71              | -1.19               | 2.00 |
| <b>Ni<sub>2</sub>-Pc</b> | -410.95 | -390.61   | -21.80 | -4.72 | 1.05              | -0.26               | 2.00 |
| <b>Sc<sub>2</sub>-Pc</b> | -413.96 | -389.92   | -24.60 | -5.87 | -0.06             | -2.08               | 3.00 |
| <b>Ti<sub>2</sub>-Pc</b> | -416.69 | -390.33   | -30.82 | -5.48 | 0.55              | -1.63               | 2.00 |
| <b>V<sub>2</sub>-Pc</b>  | -418.51 | -390.53   | -34.74 | -5.31 | 0.74              | -1.18               | 2.00 |
| <b>Zn<sub>2</sub>-Pc</b> | -399.67 | -390.38   | -2.19  | -4.10 | 0.64              | -0.76               | 2.00 |

**Table S2** The formation energy and the dissolution energy of pristine O-TM<sub>2</sub>-Pc.

|                            | <b>Surface</b> | <b>Substrate</b> | <b>Metal</b> | <b>E<sub>f</sub></b> | <b>U<sub>diss</sub></b> | <b>U<sup>0</sup><sub>diss</sub></b> | <b>Ne</b> |
|----------------------------|----------------|------------------|--------------|----------------------|-------------------------|-------------------------------------|-----------|
| <b>O-Co<sub>2</sub>-Pc</b> | -417.45        | -391.90          | -27.88       | -5.80                | 1.31                    | -0.28                               | 2.00      |
| <b>O-Cr<sub>2</sub>-Pc</b> | -427.10        | -391.87          | -36.38       | -8.52                | 1.67                    | -0.91                               | 2.00      |
| <b>O-Cu<sub>2</sub>-Pc</b> | -406.86        | -391.29          | -14.88       | -4.07                | 1.19                    | 0.34                                | 2.00      |
| <b>O-Fe<sub>2</sub>-Pc</b> | -421.22        | -392.17          | -32.31       | -6.44                | 1.39                    | -0.45                               | 2.00      |
| <b>O-Mn<sub>2</sub>-Pc</b> | -424.73        | -391.99          | -35.60       | -7.47                | 1.27                    | -1.19                               | 2.00      |
| <b>O-Ni<sub>2</sub>-Pc</b> | -413.64        | -391.96          | -21.80       | -5.39                | 1.22                    | -0.26                               | 2.00      |
| <b>O-Ti<sub>2</sub>-Pc</b> | -426.58        | -391.08          | -30.82       | 1.78                 | -1.26                   | -1.63                               | 2.00      |
| <b>O-V<sub>2</sub>-Pc</b>  | -427.28        | -391.34          | -34.74       | 8.69                 | -2.76                   | -1.18                               | 2.00      |
| <b>O-Zn<sub>2</sub>-Pc</b> | -403.53        | -391.67          | -2.19        | 0.55                 | -0.52                   | -0.76                               | 2.00      |

**Table S3** The bader charge and d band centers of transition metal pairs in pristine and axial O ligand modified TM<sub>2</sub>-Pc.

|           | <b>Bader Charge<br/>(TM<sub>2</sub>-Pc)</b> | <b>d Band Center<br/>(TM<sub>2</sub>-Pc)</b> | <b>Bader Charge<br/>(O-TM<sub>2</sub>-Pc)</b> | <b>d Band Center<br/>(O-TM<sub>2</sub>-Pc)</b> |
|-----------|---------------------------------------------|----------------------------------------------|-----------------------------------------------|------------------------------------------------|
| <b>Co</b> | -0.90                                       | -3.74                                        | -1.17                                         | -3.55                                          |
| <b>Cr</b> | -1.32                                       | -3.46                                        | -1.32                                         | -3.46                                          |
| <b>Cu</b> | -0.96                                       | -3.92                                        | -0.96                                         | -3.92                                          |
| <b>Fe</b> | -1.05                                       | -3.78                                        | -1.05                                         | -3.78                                          |
| <b>Mn</b> | -1.21                                       | -3.62                                        | -1.21                                         | -3.62                                          |
| <b>Ni</b> | -0.92                                       | -3.46                                        | -0.92                                         | -3.46                                          |
| <b>Ti</b> | -1.59                                       | -3.46                                        | -1.59                                         | -3.46                                          |
| <b>V</b>  | -1.40                                       | -3.27                                        | -1.40                                         | -3.27                                          |
| <b>Zn</b> | -1.16                                       | -4.09                                        | -1.16                                         | -4.09                                          |

**Table S4** The spin populations of transition metal pairs in pristine and axial O ligand modified V<sub>2</sub>-Pc, Cr<sub>2</sub>-Pc, Fe<sub>2</sub>-Pc.

|           | <b>Spin Populations<br/>(TM<sub>2</sub>-Pc)</b> | <b>Spin Populations<br/>(O-TM<sub>2</sub>-Pc)</b> |
|-----------|-------------------------------------------------|---------------------------------------------------|
| <b>V</b>  | 3.71                                            | 0.00                                              |
| <b>Cr</b> | 6.00                                            | 0.38                                              |
| <b>Fe</b> | 2.08                                            | 0.00                                              |

## Reference

---

- 1 G. Kresse, J. Furthmüller, Phys. Rev. B, 1996, **54**, 11169–11186.
- 2 G. Kresse, J. Hafner, Phys. Rev. B, 1993, **47**, 558–561.
- 3 J. P. Perdew, K. Burke, M. Ernzerhof, Phys. Rev. Lett., 1996, **77**, 3865–3868.
- 4 P. E. Blöchl, Phys. Rev. B, 1994, **50**, 17953–17979.
- 5 G. Kresse, D. Joubert, Phys. Rev. B: Condens. Matter Mater. Phys., 1999, **59**, 1758.
- 6 S. Grimme, J. Antony, S. Ehrlich, H. Krieg, J. Chem. Phys. 2010, **132**, 154104.
- 7 J. K. Nørskov, J. Rossmeisl, A. Logadottir, L. Lindqvist, J. R. Kitchin, T. Bligaard, H. Jónsson, J. Phys. Chem. B, 2004, **108**, 17886–17892.
- 8 J. Greeley, J. K. Nørskov, Electrochim. Acta, 2007, **52**, 5829–5836.
